# Supplementary material for: Improving scalability of Earth System Models through coarse-grained component concurrency – a case study with the ICON v2.6.5 modeling system
Source: Copernicus journal article supplement (doi:10.5194/gmd-2022-214), 2022-09-15
Supplement: Supplementary file [file gmd-2022-214-AC1-supplement.pdf]

Thank you for reviewing the paper and for your comments. I have adjusted the revised version of the paper accordingly, and here I provide the answers (in black) to your comments (in blue).

This is a good paper addressing the important topic of concurrency that has so far not been explored enough in Earth system modelling. The paper is well written but could be more concise. The theoretical analysis is backed up with convincing performance measurements that show the usefulness of concurrency. The paper will be ready for publication in GMD if the following minor comments are addressed.

More significant points:

- Page 9 seems to be broken in the published PDF. I opened the document with 3 different PDF viewers, but I never got to see the entire page.

I suspect that this relates to the pdf format of the images included in this page. I switched them to png format, and I will further ask GMD for advice.

- Overall, the document is longer than it would need to be. E.g. the model descriptions could be shortened as documentations to the models are provided as references. This is a subjective opinion by me, so feel free to disagree, but maybe you can consider making the document shorter.

I also feel that the document overall is a bit extensive and I removed some details that seemed of small contribution:

- Some details from the ICON-O model description were removed.
- The detailed memory discussion, lines 353-361, has been shortened, and Fig. 6 has been removed.

I maintained though a short description of the models, for the readers that wish to have a quick overview, without having to go through the literature.

- Section 3.2: This is a very interesting discussion. However, I am not sure how much of this is new and how much of this is common knowledge in computer science. If it is new, it should be made more prominent (e.g. in abstract and intro). If it is not new, maybe provide references more prominently.

I am not aware of any similar discussion in the computer science literature. I added one sentence hinting this analysis in the abstract: "We study the characteristics of component concurrency and analyse its behaviour in a general context. The analysis shows that component concurrency increases the "parallel workload", improving scalability under certain conditions."

- Figure 5: I am not a big fan of the figure. The left side is supposed to show a serial workflow but is showing two boxes in "parallel". Why not add a time dimension to the figure and

streamline the left side into a single line of tasks? Maybe you can also use the nomenclature of Section 3.2 (W,N...)?

I improved somewhat the left (sequential workflow) figure. Now the arrows indicate more clearly the sequential execution workflow (which also shows the top-down time direction). The right (concurrent workflow) figure is more tricky to improve, but I think it is still useful to illustrate the new code structure, and the double interfacing mechanism.

- I am missing a bit more of a discussion what happens when the components are not strictly independent. E.g. when running the radiation scheme concurrently to the rest of the atmosphere model. The independence is quite a significant limitation for couple Earth system model components.

The components are not “strictly independent”, in the sense that no dependencies exist between them. In general, I am not aware of any component in the ESM that is strictly independent, this would mean that it has no interaction whatsoever with any other component. In the case of HAMOCC, when it has only a one-way dependency on the ICON-O, the results are binary identical. When feedbacks are activated (ocean solar absorption and interactive CO<sub>2</sub>), the results are not any more binary identical and the impact has to be evaluated. I have restructured the paragraph at line 349 as follows:

“The new ICON-O-HAMOCC implementation gives bit identical results with the original one, both in the sequential and concurrent mode, when the HAMOCC feedbacks (the ocean solar radiation absorption ratio and the ocean-atmosphere CO<sub>2</sub> fluxes) are disabled. Bit identical results cannot be obtained in the case these feedbacks are activated in the concurrent mode, due to the different workflow from the sequential mode. It has been technically checked though for correctness when running with these feedbacks activated. The impact of concurrency on the results in this case still needs to be evaluated.”

This is no different from the concurrent radiation, in both cases the impact of concurrency has to be evaluated. The nature and magnitude of this impact may differ, but the underline procedure is the same. This paper though is too long to add such an important discussion, and we defer it to future work (the last paragraph in the Outlook Section refers to this).

- Paragraph starting with L369: These seem to be quite significant limitations of the approach. Could you also provide timing results with GM parametrization, IO etc. to give the reader an impression how significant the limitations are?

Adding the GMRedi parameterization would create more balanced components, and we expect this would improve the performance of concurrency (we note so in the related footnote). The reason that we have not included the GMRedi in the concurrency is purely due to high software engineering complexity, and the large amount of effort to include it in the concurrent structure. In ICON we target non-parameterized (as far possible) setups, and especially eddy-permitting with high vertical resolution, so it is not at all clear if an

investment on the GMRedi parameterizations is worth it. We will examine it in the future, if deemed necessary.

The impact of IO on performance and scaling highly depends on the output volume and frequency, and can be very different for different output demands. This makes it a poor objective criterion for model scaling tests. On the other hand, in practice it is clearly a factor to take into account. We expect that concurrency will have a positive impact on IO, as it provides natural parallelism for the whole infrastructure, we discuss this in the paragraph L. 529. This approach is MPI based, in a similar way that we run the coupled atmosphere and ocean models, so all infrastructure calls, including output, are automatically component-parallelized too. I hope we will have some results on this in the future, but I feel this paper is already too extensive to include here further experiments.

- Can you say anything about the energy cost when using concurrency (or not)? No big problem if not.

As a general comment, I would expect that when a setup provides better performance on the same number of nodes, it is also more energy efficient. How these two are related for different architectures would be an interesting question. I have not any numbers on this though.

- Maybe I missed the information, but do you state somewhere how long the individual experiments were and how many you have run for each performance measure to reduce measurement errors?

The information is in: L. 367, “Each of the runs was repeated three times...”. L. 383, the 160km experiment ran for five simulated years. L. 454, the 40km ran for one simulated year.

- I am not quite sure whether you present results from the old and the new machine at DKRZ since it is useful (2 generations of machines), or just since the machine has changed in the meanwhile. Both would be OK but maybe you can justify somewhere.

The first experiments with 160km were performed on the old machine, as the new one was not available yet. When the new machine became available I thought it was a good opportunity to compare the impact of concurrency on the two machines. So it is a bit of both.

#### Minor points:

L6-7: “The novel...” This sentence is a bit odd and “function parallel technique” is unclear at this stage.

I added a clarification as follows, although the exact meaning has to be developed in the analysis.

“The novel aspect is that component concurrency is a function parallel technique, that is it decomposes the algorithmic space, while these parallelization methods are data parallel techniques, they decompose the data space.”

L41: "...cannot efficiently scale" That is quite a statement. Can you provide a reference?

I have slightly changed the sentence to: "In the last years it has become apparent that domain decomposition methods alone cannot efficiently scale...". I did not find a reference on this, and this is partly why I spent a bit of time discussing in this paper the behavior of domain decomposition scaling. While a few years ago there was still some skepticism of the usefulness of shared memory parallelization, like OpenMP, currently I believe all major ESMs employ some form of shared memory parallelization. In other words, the community has voted by their code, and in this sense I consider it to "become apparent".

Figure 1: "sea-land mask is in color" ?

There is one layer of land triangles that serve as boundary to ocean. I removed this detail from the legend as it is not easy to see it.

L113: Better say "local grid-spacings of 600m"

Changed.

L158: Maybe it is just me, but I am not sure what a "trophic level" is.

Trophic levels in general refer to the levels of the food pyramid. In this sentence they refer to the level 1 primary production of organic matter (phytoplankton), and the level 2 organic matter metabolism (zooplankton).

L176: "and may only need... components" Is unclear and should be revised.

We have further clarified it as follows: "The components are algorithmically independent, and may only need to receive input data from other components once in each timestep. For example, the ocean model in a coupled setup requires the atmosphere surface fluxes at the start of each timestep, and then can proceed independently from the atmosphere model."

L190: "in of"

Corrected

You could cite work of ESiWACE from a couple of years ago (but no worries if you disagree): <https://zenodo.org/record/1453858#.Y0KPyi8Rp9c>

Thanks for pointing this out, I was not aware of this work. I have included a citation in the introduction.

L319: I do not understand this sentence and it should be rephrased.

Changed to: "The second order method flux calculations are based on compatible reconstructions..."

L349: Is there a performance hit when guaranteeing bit-reproducible results? I assume this only holds if the concurrent parts are running on the same hardware?

Bit identical results are obtained on the same hardware when the ocean runs on the same amount of mpi process and the same OpenMP threads (independently of how many procs HAMOCC uses). This has no impact on the performance (optimization flags are set to -O3).

L377: “No such effort...” I think this is an understatement. Maybe say that those parameters have not been optimised?

I think the expression is accurate, the number of mpi procs was predefined, and no calculation took place for improving shared memory balancing.

L410: si -> is

Fixed

L474: “does not apply”. Well, I guess this is always only an approximation. -> “is a bad approximation due to the unusual super-linear...”

I changed it to “We note that the assumptions for formula 2 do not apply to this experiment.” In this case we have a component with increasing cost as a function of nodes, which is not accounted in this formula. See also line 476: “This cost is significant, and is not been accounted in formula 2.”

L513: remove “though”

Done.
